# Supplementary material for: Toxicity Profiling of Biosurfactants Produced by Novel Marine Bacterial Strains
Source: PubMed Central journal article supplement (PMC7956851; doi:10.3390/ijms22052383), 2021-02-27
Supplement: ijms-22-02383-s001.pdf [file ijms-22-02383-s001.pdf]

# Toxicity profiling of biosurfactants produced by novel marine bacterial strains

Georgia-Persephoni Voulgaridou, Theodora Mantso, Ioannis Anestopoulos, Ariel Klavaris, Christina Katzastra, Despoina-Eugenia Kioussi, Marini Mantela, Alex Galanis, Konstantinos Gardikis, Ibrahim M. Banat, Tony Gutierrez, Karina Salek, Stephen Euston, Mihalis I. Panayiotidis and Aglaia Pappa

## Supplementary Material

**Table 1.** Rhamnolipid congeners produced by *Pseudomonas* sp. MCTG214(3b1) and their percentage relative abundance. Data adapted from [11].

| Compound                                                                   | Molecular form                                  | % Relative abundance |
|----------------------------------------------------------------------------|-------------------------------------------------|----------------------|
| Rha-Rha-C <sub>10</sub>                                                    | C <sub>22</sub> H <sub>40</sub> O <sub>11</sub> | 23.8                 |
| Rha-Rha-C <sub>10</sub> -C <sub>10</sub>                                   | C <sub>32</sub> H <sub>58</sub> O <sub>13</sub> | 42.74                |
| Rha-C <sub>10</sub> -C <sub>10</sub> /C <sub>8</sub> -C <sub>12</sub>      | C <sub>26</sub> H <sub>48</sub> O <sub>9</sub>  | 12.26                |
| Rha-Rha-C <sub>10</sub> -C <sub>12</sub> /C <sub>12</sub> -C <sub>10</sub> | C <sub>34</sub> H <sub>62</sub> O <sub>13</sub> | 9.78                 |
| Rha-Rha-C <sub>8</sub> -C <sub>10</sub> /C <sub>10</sub> -C <sub>8</sub>   | C <sub>30</sub> H <sub>54</sub> O <sub>13</sub> | 11.42                |

**Table 2.** Rhamnolipid (mono- and di-rhamnolipid) congeners produced by *Pseudomonas* sp. MCTG107B and their percentage relative abundance. Data adapted from [12].

| Compound                                                                                                             | Molecular form                                  | % Relative abundance |
|----------------------------------------------------------------------------------------------------------------------|-------------------------------------------------|----------------------|
| Rha-C <sub>14:2</sub>                                                                                                | C <sub>20</sub> H <sub>34</sub> O <sub>7</sub>  | 3.18                 |
| Rha-C <sub>10</sub> -C <sub>12</sub> /Rha-C <sub>12</sub> -C <sub>10</sub>                                           | C <sub>28</sub> H <sub>52</sub> O <sub>9</sub>  | 0.22                 |
| Rha-C <sub>10</sub> -C <sub>10:1</sub>                                                                               | C <sub>26</sub> H <sub>46</sub> O <sub>9</sub>  | 0.27                 |
| Rha-C <sub>12</sub> -C <sub>12</sub> /Rha-C <sub>10</sub> -C <sub>14</sub>                                           | C <sub>30</sub> H <sub>56</sub> O <sub>9</sub>  | 0.94                 |
| Rha-Rha-C <sub>8</sub>                                                                                               | C <sub>20</sub> H <sub>36</sub> O <sub>11</sub> | 1.95                 |
| Rha-Rha-C <sub>10</sub>                                                                                              | C <sub>22</sub> H <sub>40</sub> O <sub>11</sub> | 5.13                 |
| Rha-Rha-C <sub>14</sub>                                                                                              | C <sub>26</sub> H <sub>48</sub> O <sub>11</sub> | 0.21                 |
| Rha-Rha-C <sub>10</sub> -C <sub>10:1</sub> /Rha-Rha-C <sub>10:1</sub> -C <sub>10</sub>                               | C <sub>32</sub> H <sub>56</sub> O <sub>13</sub> | 2.85                 |
| Rha-Rha-C <sub>10</sub> -C <sub>10</sub>                                                                             | C <sub>34</sub> H <sub>58</sub> O <sub>13</sub> | 52.45                |
| Rha-Rha-C <sub>10</sub> -C <sub>12:1</sub>                                                                           | C <sub>33</sub> H <sub>60</sub> O <sub>13</sub> | 1.06                 |
| Rha-Rha-C <sub>10</sub> -C <sub>10</sub> -CH <sub>3</sub>                                                            | C <sub>42</sub> H <sub>60</sub> O <sub>13</sub> | 23.07                |
| Decenoyl-Rha-Rha-C <sub>10</sub> -C <sub>10:1</sub>                                                                  | C <sub>35</sub> H <sub>72</sub> O <sub>11</sub> | 0.40                 |
| Rha-Rha-C <sub>10</sub> -C <sub>12</sub> /Rha-Rha-C <sub>12</sub> -C <sub>10</sub>                                   | C <sub>35</sub> H <sub>64</sub> O <sub>13</sub> | 5.01                 |
| Rha-Rha-C <sub>10</sub> -C <sub>12</sub> -CH <sub>3</sub> /Rha-Rha-C <sub>12</sub> -C <sub>10</sub> -CH <sub>3</sub> | C <sub>35</sub> H <sub>64</sub> O <sub>13</sub> | 3.26                 |

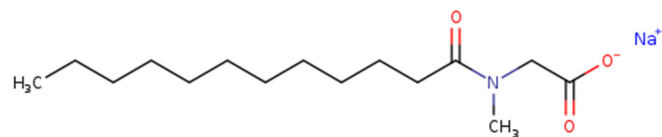

Sodium lauroylsarcosinate  
(a)

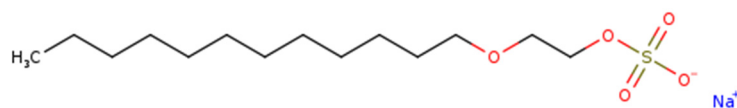

Sodium lauryl ether sulphate  
(b)

Figure 1. Chemical structures of (a) sodium lauroylsarcosinate and (b) sodium lauryl ether sulphate.
